# Supplementary material for: Functional MRI Lateralization [M1] of dlPFC and Implications for Transcranial Magnetic Stimulation (TMS) Targeting
Source: MDPI journal article supplement (doi:10.3390/diagnostics13162690), 2023-08-16
Supplement: s1 [file s1]

**Table S1.** Full breakdown of all participants and their respective demographics, handedness, and blinded reviewer assessment of dlPFC lateralization.

| <u>Participant</u> | <u>Diagnosis</u>                                                          | <u>Gender</u> | <u>Age</u> | <u>Edinburgh<br/>Handedness</u> | <u>Blinded<br/>Reviewer #1</u> | <u>Blinded<br/>Reviewer #2</u> |
|--------------------|---------------------------------------------------------------------------|---------------|------------|---------------------------------|--------------------------------|--------------------------------|
| P1                 | Major<br>Depressive<br>Disorder<br>(MDD),<br>Pudendal Nerve<br>Entrapment | M             | 36         | RIGHT                           | LEFT                           | LEFT                           |
| P2                 | MDD                                                                       | F             | 63         | LEFT                            | LEFT                           | LEFT                           |
| P3                 | MDD                                                                       | M             | 55         | RIGHT                           | LEFT                           | LEFT                           |
| P4                 | MDD                                                                       | M             | 72         | RIGHT                           | LEFT                           | LEFT                           |
| P5                 | MDD, Lumbar<br>Radiculopathy                                              | F             | 62         | RIGHT                           | LEFT                           | LEFT                           |
| P6                 | MDD                                                                       | F             | 23         | RIGHT                           | RIGHT                          | RIGHT                          |
| P7                 | MDD                                                                       | M             | 49         | RIGHT                           | LEFT                           | LEFT                           |
| P8                 | MDD                                                                       | M             | 22         | RIGHT                           | LEFT                           | LEFT                           |
| P9                 | MDD                                                                       | M             | 26         | RIGHT                           | RIGHT                          | LEFT                           |
| P10                | MDD,<br>Unspecified<br>Sleep Disorder                                     | M             | 26         | RIGHT                           | RIGHT                          | RIGHT                          |
| P11                | MDD                                                                       | M             | 17         | LEFT                            | RIGHT                          | RIGHT                          |
| P12                | MDD, Migraine<br>with Aura                                                | F             | 39         | RIGHT                           | LEFT                           | LEFT                           |
| P13                | MDD, Post<br>Traumatic Stress<br>Disorder                                 | M             | 20         | AMBI                            | RIGHT                          | LEFT                           |
| P14                | MDD, Obsessive<br>Compulsive<br>Disorder                                  | M             | 50         | RIGHT                           | LEFT                           | LEFT                           |
| P15                | MDD,<br>Headache                                                          | F             | 62         | LEFT                            | LEFT                           | RIGHT                          |
| P16                | MDD                                                                       | F             | 23         | RIGHT                           | LEFT                           | LEFT                           |
| P17                | MDD                                                                       | M             | 28         | RIGHT                           | LEFT                           | LEFT                           |
| P18                | MDD                                                                       | F             | 56         | RIGHT                           | LEFT                           | LEFT                           |
| P19                | MDD                                                                       | F             | 50         | RIGHT                           | LEFT                           | LEFT                           |
| P20                | MDD                                                                       | M             | 63         | RIGHT                           | LEFT                           | LEFT                           |
| P21                | MDD, Chronic<br>Migraine,<br>Tinnitus                                     | M             | 20         | RIGHT                           | LEFT                           | LEFT                           |
| P22                | MDD                                                                       | F             | 48         | AMBI                            | RIGHT                          | RIGHT                          |
| P23                | MDD                                                                       | M             | 26         | RIGHT                           | RIGHT                          | RIGHT                          |

|     |                                                 |   |    |       |       |       |
|-----|-------------------------------------------------|---|----|-------|-------|-------|
| P24 | MDD                                             | F | 52 | RIGHT | LEFT  | LEFT  |
| P25 | MDD                                             | M | 45 | RIGHT | LEFT  | LEFT  |
| P26 | MDD, Thoracic Outlet Syndrome                   | F | 62 | RIGHT | LEFT  | LEFT  |
| P27 | MDD                                             | F | 52 | RIGHT | LEFT  | LEFT  |
| P28 | MDD                                             | F | 21 | RIGHT | LEFT  | LEFT  |
| P29 | MDD                                             | F | 66 | AMBI  | RIGHT | RIGHT |
| P30 | MDD, Myalgia                                    | F | 30 | RIGHT | RIGHT | RIGHT |
| P31 | MDD                                             | F | 40 | RIGHT | LEFT  | LEFT  |
| P32 | MDD, Fibromyaglia, Sleep Apnea                  | M | 43 | RIGHT | RIGHT | LEFT  |
| P33 | MDD, Lumbar Radiculopathy                       | M | 73 | RIGHT | RIGHT | RIGHT |
| P34 | MDD, Traumatic Brain Injury                     | M | 33 | RIGHT | LEFT  | LEFT  |
| P35 | MDD, Spastic Hemiplegia on Right Side           | M | 34 | RIGHT | RIGHT | RIGHT |
| P36 | MDD                                             | M | 51 | RIGHT | LEFT  | RIGHT |
| P37 | MDD                                             | M | 75 | RIGHT | RIGHT | LEFT  |
| P38 | MDD, Trigeminal Neuralgia                       | M | 63 | RIGHT | LEFT  | LEFT  |
| P39 | MDD                                             | F | 36 | RIGHT | LEFT  | LEFT  |
| P40 | MDD, Lumbar Radiculopathy, Trigeminal Neuralgia | F | 37 | RIGHT | LEFT  | LEFT  |
| P41 | MDD                                             | M | 24 | RIGHT | RIGHT | RIGHT |
| P42 | MDD, Dysuria                                    | M | 29 | RIGHT | LEFT  | LEFT  |
| P43 | MDD, Lumbar Radiculopathy                       | M | 51 | RIGHT | RIGHT | RIGHT |
| P44 | MDD                                             | F | 55 | LEFT  | RIGHT | RIGHT |
| P45 | MDD, Lumbar Radiculopathy, Spinal Stenosis      | M | 56 | RIGHT | RIGHT | RIGHT |
| P46 | MDD                                             | M | 29 | RIGHT | LEFT  | LEFT  |
| P47 | MDD, Fibromyaglia                               | F | 36 | LEFT  | RIGHT | RIGHT |
| P48 | MDD, Post Traumatic Stress Disorder,            | M | 39 | AMBI  | LEFT  | LEFT  |

|     |                                                              |   |    |       |       |       |
|-----|--------------------------------------------------------------|---|----|-------|-------|-------|
|     | Complex<br>Regional Pain<br>Syndrome                         |   |    |       |       |       |
| P49 | MDD, Tremor,<br>Tinnitus, Lyme<br>Disease,<br>Encephalopathy | F | 59 | LEFT  | RIGHT | RIGHT |
| P50 | MDD                                                          | M | 26 | RIGHT | LEFT  | LEFT  |
| P51 | MDD                                                          | M | 62 | RIGHT | LEFT  | RIGHT |
| P52 | MDD, Post<br>Traumatic Stress<br>Disorder,<br>Migraine       | F | 36 | RIGHT | LEFT  | LEFT  |
| P53 | MDD                                                          | M | 51 | RIGHT | LEFT  | LEFT  |
| P54 | MDD, Migraine                                                | F | 60 | LEFT  | RIGHT | RIGHT |
| P55 | MDD,<br>Idiopathic<br>Epilepsy                               | M | 59 | RIGHT | LEFT  | LEFT  |
| P56 | MDD                                                          | M | 23 | RIGHT | LEFT  | LEFT  |
| P57 | MDD                                                          | F | 24 | RIGHT | LEFT  | LEFT  |
| P58 | MDD,<br>Generalized<br>Anxiety<br>Disorder                   | M | 22 | RIGHT | LEFT  | LEFT  |
